# Supplementary material for: Interpretation of anomalously long crosslinks in ribosome crosslinking reveals the ribosome interaction in stationary phase E. coli
Source: Royal Society of Chemistry journal article supplement (doi:10.1039/d2cb00101b), 2022-01-01
Supplement: d2cb00101b1.pdf [file d2cb00101b1.pdf]

## Supporting information

### Interpretation of Anomalously Long Crosslinks in Ribosome Crosslinking reveals the ribosome interaction in stationary phase *E. coli*

Santosh A. Misal\*; Bingqing Zhao; James P. Reilly

Department of Chemistry, Indiana University, Bloomington, IN 47405

Correspondence- Santosh A. Misal, [santosh.misal@nih.gov](mailto:santosh.misal@nih.gov)

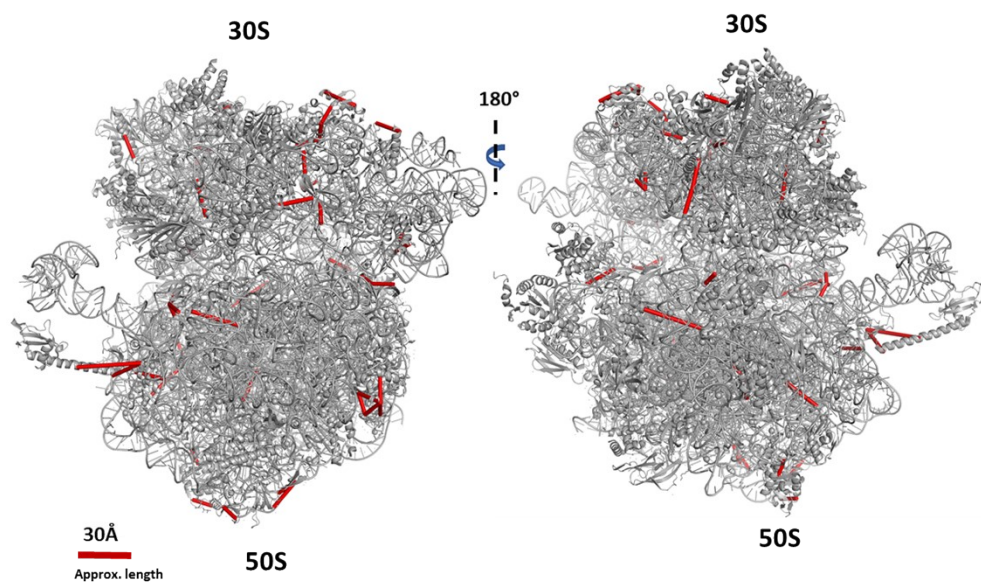

Figure S1: The short crosslinks ( $<40\text{\AA}$ ) are mapped in the 70S ribosome crystal structure (PDB 4YBB) using the PyXlinkViewer plugin in PyMOL v2.4.1 - Schrodinger, LLC. The complete list is given in Table S1.

**Table S1. Peptides and dead-ends of HPF and RMF were observed in the analysis.**

| Tr<br>ap | Fragmentatio<br>n method | Peptide                                | Dead-<br>end<br>mass | Protein                                             |
|----------|--------------------------|----------------------------------------|----------------------|-----------------------------------------------------|
| 2        | CID                      | (K)FA[K26]LEQYFDR(I)                   | 153.1216             | P0AFX0 HPF_Ribosome<br>hibernation promoting factor |
| 3        | hcd                      | (K)HKDKLKQH(-)                         |                      | P0AFX0 HPF_Ribosome<br>hibernation promoting factor |
| 3        | HCD                      | (R)S[K26]EM*CPYQTLNQ<br>R(S)           | 155.0946             | P0AFW2 RMF_Ribosome<br>modulation factor            |
| 3        | hcd                      | (R)S[K26]EM*CPYQTLNQ<br>R(S)           | 155.0946             | P0AFW2 RMF_Ribosome<br>modulation factor            |
| 4        | ETD                      | (R)LERAHQR(G)                          |                      | P0AFW2 RMF_Ribosome<br>modulation factor            |
| 4        | ETD                      | (R)LERAHQR(G)                          |                      | P0AFW2 RMF_Ribosome<br>modulation factor            |
| 4        | CID                      | (R)EFVTAKFAK(L)                        |                      | P0AFX0 HPF_Ribosome<br>hibernation promoting factor |
| 4        | hcd                      | (R)EFVTAKFAK(L)                        |                      | P0AFX0 HPF_Ribosome<br>hibernation promoting factor |
| 4        | hcd                      | (K)DKL[K93]QH(-)                       | 136.0992             | P0AFX0 HPF_Ribosome<br>hibernation promoting factor |
| 4        | CID                      | (M)[Q2]LNITGNNVEITEA<br>LREFVTAKFAK(L) | 258.169              | P0AFX0 HPF_Ribosome<br>hibernation promoting factor |
| 6        | hcd                      | (R)QLT[K87]HKDK(L)                     | 136.0971             | P0AFX0 HPF_Ribosome<br>hibernation promoting factor |
| 6        | ETD                      | (K)H[K89]DKLKQH(-)                     | 136.0987             | P0AFX0 HPF_Ribosome<br>hibernation promoting factor |
| 6,<br>7  | ETD, CID, HCD            | (R)QLT[K87]HK(D)                       | 155.0954             | P0AFX0 HPF_Ribosome<br>hibernation promoting factor |
| 9        | hcd                      | (R)QLT[K87]HKDK(L)                     | 136.0973             | P0AFX0 HPF_Ribosome<br>hibernation promoting factor |

**Table S2. The short crosslinks (<40Å) were observed in the dimer and trimer ribosomes.**

| Trap Number | m/z     | Peptide 1                              | Peptide 2              | Protein 1 | Protein 2 | XL length (Å) |
|-------------|---------|----------------------------------------|------------------------|-----------|-----------|---------------|
| Trap1       |         |                                        |                        |           |           |               |
|             | 350.80  | 4(R)AIQSE[K16]AR(K)                    | 4(R)[K19]HNASR(R)      | S20       | S20       | 5.2           |
|             | 546.29  | 4(K)SNSETI[K104](-)                    | 4(R)FEDG[K91]K(V)      | L24       | L24       | 18            |
|             | 471.03  | 4(R)V[K156]AALELAEQR(E)                | 4(K)[K151]QSR(V)       | S4        | S4        | 8.07          |
|             | 478.78  | 4(R)SGSI[K74]SPIWR(S)                  | 4(R)Q[K63]GTGR(A)      | L4        | L4        | 19.75         |
|             | 431.77  | 4(R)[K11]ILPDPK(F)                     | 4(R)[K100]AGFVTR(D)    | S7        | S9        | 14.1          |
|             | 605.34  | 4(R)VFQTHSPVVDISV[K87]R(R)             | 4(R)[K63]ISNGEGVER(V)  | L19       | L19       | 13.22         |
|             | 632.74  | 4(R)VGFFNPIASE[K46]EEGTRLDLDR(I)       | 4(K)EVN[K80]AA(-)      | S16       | S16       | 17.4          |
| Trap2       |         |                                        |                        |           |           |               |
|             | 428.04  | 4(R)HIGGGH[K59]QAYR(I)                 | 4(R)IVDF[K68]R(N)      | L2        | L2        | 26.9          |
|             | 340.23  | 4(R)[K76]FGLSR(I)                      | 4(R)I[K83]VR(E)        | S14       | S14       | 12.71         |
|             | 471.03  | 4(R)V[K156]AALELAEQR(E)                | 4(K)[K151]QSR(V)       | S4        | S4        | 8             |
|             | 487.95  | 4(R)FNIPGS[K70](-)                     | 4(R)FN[K62]R(F)        | L31       | L31       | NA            |
|             | 474.26  | 4(R)[K183]VEADCR(A)                    | 4(R)TD[K265]FIVR(R)    | L2        | L2        | 8.2           |
|             | 464.08  | 4(R)RLP[K63]FGFTSR(K)                  | 4(R)[K70]AAITAEIR(L)   | L15       | L15       | 20.8          |
|             | 593.07  | 4(K)[K42]NIEFFEAR(R)                   | 4(R)FWVESE[K44]R(F)    | L9        | L28       | 22.8          |
|             | 591.35  | 4(R)L[K83]GNTGENLLALLEGR(L)            | 4(R)[K185]PER(S)       | S4        | S4        | 14.59         |
|             | 673.41  | 4(R)GAL[K106]SILSELVR(Q)               | 4(K)[K99]MYR(G)        | L4        | L4        | 10.6          |
|             | 745.01  | (R)E[K167]PTWLEVDAGKMEGTFK[136.10]R(K) | (R)V[K156]AALELAEQR(E) | S4        | S4        | 16.4          |
|             | 570.32  | 4(R)L[K83]GNTGENLLALLEGR(L)            | 4(R)NYY[K77]EAAR(L)    | S4        | S4        | 11.8          |
|             | 642.86  | 4(R)ALLAAFDFPFR[K179](-)               | 4(R)GLSA[K120]SFDGR(G) | L5        | L5        | 15.9          |
|             | 985.87  | 4(R)AELEA[K57]LAEVLAAANAR(A)           | 4(R)FWVESE[K44]R(F)    | L9        | L28       | 33.13         |
|             | 591.34  | (R)L[K83]GNTGENLLALLEGR(L)             | (R)[K185]PER(S)        | S4        | S4        | 14.59         |
|             | 1037.91 | (R)RAELEA[K57]LAEVLAAANAR(A)           | (R)FWVESE[K44]R(F)     | L9        | L28       | 33.13         |
|             | 348.88  | (R)LGAKGI[K150]VEVSGR(L)               | (M)[&2]HIEK(Q)         | S3        | S5        | 39.6          |
|             | 605.05  | 4(K)LLDYL[K71]R(K)                     | 4(R)VVE[K81]AVL(-)     | S15       | S17       | 18            |
|             | 410.00  | (-)MAKLT[K6]R(M)                       | (R)GH[K36]GQK(S)       | L1        | L15       | NA            |

|        |                               |                      |     |     |        |
|--------|-------------------------------|----------------------|-----|-----|--------|
| 778.68 | 3(R)RAELEA[K57]LAEVLAAANAR(A) | 3(R)FWVESE[K44]R(F)  | L9  | L28 | 33.138 |
| 639.93 | 3(R)SDLSADINEHLIVELY[K206](-) | 3(R)NY[Y[K77]EAAR(L) | S4  | S4  | 13.52  |
| 546.29 | 4(K)SNSETI[K104](-)           | 4(R)FEDG[K91]K(V)    | L24 | L24 | 18     |
| 593.07 | 4(K)[K42]NIEFFEAR(R)          | 4(R)FWVESE[K44]R(F)  | L9  | L28 | 22.78  |
| 623.15 | 4(R)RAELEA[K57]LAEVLAAANAR(A) | 4(R)FWVESE[K44]R(F)  | L9  | L28 | 33.138 |
| 380.23 | 4(R)TD[K265]FIVR(R)           | 4(R)SN[K261]R(T)     | L2  | L2  | 7.3    |
| 318.20 | 4(R)QG[K62]IWIR(V)            | 4(R)T[K8]FR(K)       | L16 | L16 | 32.2   |
| 474.26 | 4(R)[K183]VEADCR(A)           | 4(R)TD[K265]FIVR(R)  | L2  | L2  | 8.2    |

Trap4

|        |                                          |                        |     |     |        |
|--------|------------------------------------------|------------------------|-----|-----|--------|
| 618.37 | 3(R)[K108]PELDAK[153.13][LVADSITSQLER(R) | 3(R)LGA[K147]GIK(V)    | S3  | S3  | 14.614 |
| 567.74 | 4(R)RDDEVIVLTG[K17]DK(G)                 | 4(K)VIVEGINLV[K43]K(H) | L24 | L24 | 15.1   |
| 519.05 | 4(K)[K62]GIDTVLAE(LR(A)                  | 4(R)ARGE[K77]Y(-)      | L28 | L28 | 19.228 |
| 482.31 | 3(R)LIVVE[K123]FSVEAPK(T)                | 3(K)LLAQ[K137]LK(D)    | L4  | L4  | 13.163 |
| 593.07 | 4(K)[K42]NIEFFEAR(R)                     | 4(R)FWVESE[K44]R(F)    | L9  | L28 | 22.78  |
| 902.95 | 4(R)TT[K43]LHVHDENNECGIGDVVEIR(E)        | 4(R)VVSD[K16]MEK(S)    | S17 | S17 | 14.8   |
| 772.91 | 4(K)AAAQ[K49]AFNEMQPIVDR(Q)              | 4(K)[K34]VYAAIEAGDK(A) | S20 | S20 | 9.855  |
| 594.82 | 4(R)E[K167]PTWLEVDAGK(M)                 | 4(K)MEGTF[K183]R(K)    | S4  | S4  | 13.532 |
| 705.89 | 2(R)NIPVGSTVHNEM[K147]PGK(G)             | 2(R)TD[K265]FIVR(R)    | L2  | L2  | 14.6   |
| 598.81 | 4(R)E[K167]PTWLEVDAGK(M)                 | 4(K)M*EGTF[K183]R(K)   | S4  | S4  | 13.532 |
| 776.91 | 4(K)AAAQ[K49]AFNEM*QPIVDR(Q)             | 4(K)[K34]VYAAIEAGDK(A) | S20 | S20 | 9.855  |
| 485.26 | 4(R)GALDCSGV[K108]DR(K)                  | 4(K)YGV[K120]R(P)      | S12 | S12 | 10     |
| 756.42 | 4(R)VFQTHSPVDSISV[K87]R(R)               | 4(R)[K63]ISNGEGVER(V)  | L19 | L19 | 13.228 |
| 379.61 | 4(R)[K183]VEADCR(A)                      | 4(R)TD[K265]FIVR(R)    | L2  | L2  | 8.2    |
| 605.34 | 4(R)VFQTHSPVDSISV[K87]R(R)               | 4(R)[K63]ISNGEGVER(V)  | L19 | L19 | 13.228 |
| 474.26 | 4(R)[K183]VEADCR(A)                      | 4(R)TD[K265]FIVR(R)    | L2  | L2  | 8.2    |
| 488.31 | 4(K)VIVEGINLV[K43]K(H)                   | 4(K)DKG[K21]R(G)       | L24 | L24 | 18.8   |
| 589.08 | 4(R)DHTLFA[K62]ADGK(V)                   | 4(R)[K17]LQELGATR(L)   | L27 | L18 | 15.512 |
| 507.83 | 4(R)K[155.09][VIA[K57](-)                | 4(R)HEII[K35]TTLPK(A)  | L32 | L17 | 13.203 |
| 542.32 | 3(R)G[K24]VK[136.10][NVLSSGK(V)          | 3(K)SNSETI[K104](-)    | L24 | L24 | 20     |
| 455.24 | 4(R)GALDCSGV[K108]DR(K)                  | 4(R)[K111]QAR(S)       | S12 | S12 | 9.3    |
| 555.81 | 4(R)HEII[K35]TTLPK(A)                    | 4(R)SE[K121]AEAAAE(-)  | L17 | L17 | 9.2    |

|         |                                      |                        |     |     |        |
|---------|--------------------------------------|------------------------|-----|-----|--------|
| 481.07  | 3(R)AK[136.10][[ASAV[K54]R(H)        | 3(R)EFYE[K40]PTTER(K)  | S21 | S21 | 21.312 |
| 585.34  | 4(R)K[155.09][[VIA[K57](-)           | 4(R)SE[K121]AEAAAAE(-) | L32 | L17 | 14.5   |
| 471.03  | 4(R)V[K156]AAELEAEQR(E)              | 4(K)[K151]QSR(V)       | S4  | S4  | 8.078  |
| 546.29  | 4(K)SNSETI[K104](-)                  | 4(R)FEDG[K91]K(V)      | L24 | L24 | 18.4   |
| 541.34  | 4(R)[K108]PELDAK(L)                  | 4(R)LGA[K147]GIK(V)    | S3  | S3  | 14.614 |
| 585.01  | 2(R)K[154.11][[VIA[K57](-)           | 2(R)SE[K121]AEAAAAE(-) | L32 | L17 | 14.5   |
| 546.29  | 4(K)SNSETI[K104](-)                  | 4(R)FEDG[K91]K(V)      | L24 | L24 | 18.4   |
| 438.76  | 4(R)K[153.13][[VIA[K57](-)           | 4(R)SE[K121]AEAAAAE(-) | L32 | L17 | 14.5   |
| 533.64  | 4(R)SE[K121]AEAAAAE(-)               | 4(R)[K53]VIAK(-)       | L17 | L32 | 14.5   |
| 409.97  | 4(K)SNSETI[K104](-)                  | 4(R)FEDG[K91]K(V)      | L24 | L24 | 18.4   |
| 457.51  | 4(R)[K63]ISNGEGVER(V)                | 4(R)TG[K106]AAR(I)     | L19 | L19 | 14.464 |
| 438.25  | 4(R)AIQSE[K16]AR(K)                  | 4(R)[K19]HNASR(R)      | S20 | S20 | 5.308  |
| 985.88  | 4(R)AELEA[K57]LAEVLAAANAR(A)         | 4(R)FWVESE[K44]R(F)    | L9  | L28 | 33.138 |
| 919.15  | 2(R)DNEIVA[K78]LFNELGPR(F)           | 2(R)SE[K121]AEAAAAE(-) | L17 | L17 | 26.4   |
| 874.50  | 3(K)AIISDVNASDEDRWNAVL[K47]LQTLPR(D) | 3(K)KGPFDLHLL[K17]K(V) | S14 | S19 | 13.6   |
| 1037.91 | 3(R)RAELEA[K57]LAEVLAAANAR(A)        | 3(R)FWVESE[K44]R(F)    | L9  | L28 | 33.138 |
| 799.66  | 3(R)SDLSADINEHLIVELYS[K206](-)       | 3(R)NYY[K77]EAAR(L)    | S4  | S4  | 13.52  |
| 603.32  | 3(R)TRDNEIVA[K78]LFNELGPR(F)         | 3(R)SE[K121]AEAAAAE(-) | L17 | L17 | 26.4   |
| 608.17  | 2(K)AIISDVNASDEDRWNAVL[K47]LQTLPR(D) | 2(K)YFA[K23]R(A)       | S14 | S14 | 13.847 |
| 712.64  | 3(R)L[K83]GNTGENLLALLEGR(L)          | 3(R)NYY[K77]EAAR(L)    | S4  | S4  | 11.851 |
| Trap5   |                                      |                        |     |     |        |
| 350.80  | 4(R)AIQSE[K16]AR(K)                  | 4(R)[K19]HNASR(R)      | S20 | S20 | 5.308  |
| 406.26  | 4(R)[K108]PELDAK(L)                  | 4(R)LGA[K147]GIK(V)    | S3  | S3  | 14.614 |
| 474.26  | 4(R)[K183]VEADCR(A)                  | 4(R)TD[K265]FIVR(R)    | L2  | L2  | 8.2    |
| 788.13  | 4(R)L[K83]GNTGENLLALLEGR(L)          | 4(R)[K185]PER(S)       | S4  | S4  | 14.592 |
| 778.68  | 4(R)RAELEA[K57]LAEVLAAANAR(A)        | 4(R)FWVESE[K44]R(F)    | L9  | L28 | 33.138 |
| 409.97  | 4(K)SNSETI[K104](-)                  | 4(R)FEDG[K91]K(V)      | L24 | L24 | 18.4   |
| 686.39  | 3(R)[K14]QVSDGVAHIHASFNNITVITDR(Q)   | 3(M)[a2]KAPIR(A)       | S11 | S11 | NA     |
| 722.56  | 3(R)TT[K43]LHVHDENNECGIGDVVEIR(E)    | 3(R)VVSD[K16]MEK(S)    | S17 | S17 | 14.8   |
| 591.35  | 3(R)L[K83]GNTGENLLALLEGR(L)          | 3(R)[K185]PER(S)       | S4  | S4  | 14.592 |
| 799.66  | 3(R)SDLSADINEHLIVELYS[K206](-)       | 3(R)NYY[K77]EAAR(L)    | S4  | S4  | 13.52  |

|       |        |                                     |                         |     |     |        |
|-------|--------|-------------------------------------|-------------------------|-----|-----|--------|
|       | 533.64 | 4(R)SE[K121]AEAAAAE(-)              | 4(R)[K53]VIAK(-)        | L17 | L32 | 14     |
|       | 438.76 | 4(R)K[153.13][VIA[K57]](-)          | 4(R)SE[K121]AEAAAAE(-)  | L32 | L17 | 14.5   |
|       | 546.29 | 4(K)SNSETI[K104]](-)                | 4(R)FEDG[K91]K(V)       | L24 | L24 | 18.4   |
| Trap6 |        |                                     |                         |     |     |        |
|       | 686.39 | 3(R)[K14]QVSDGVAHIHASFNNTIVTITDR(Q) | 3(M)a[K3]APIR(A)        | S11 | S11 | NA     |
|       | 623.15 | 3(R)RAELEA[K57]LAEVLAAANAR(A)       | 3(R)FWVESE[K44]R(F)     | L9  | L28 | 33.138 |
|       | 406.07 | 3(R)K[153.13][VIA[K57]](-)          | 3(R)HEII[K35]TTLPK(A)   | L32 | L17 | 13.203 |
|       | 474.26 | 3(R)[K183]VEADCR(A)                 | 3(R)TD[K265]FIVR(R)     | L2  | L2  | 8.2    |
|       | 447.48 | 3(K)A[K150]K[153.13][QSR(V)         | 3(R)V[K156]AAELEAEQR(E) | S4  | S4  | 8.678  |
|       | 438.25 | 4(R)AIQSE[K16]AR(K)                 | 4(R)[K19]HNASR(R)       | S20 | S20 | 5.308  |
|       | 463.03 | 4(K)EAK[136.10][K[K177]](-)         | 4(R)RPEPY[K158]GK(G)    | L6  | L6  | 18.6   |
|       | 474.26 | 4(R)[K183]VEADCR(A)                 | 4(R)TD[K265]FIVR(R)     | L2  | L2  | 8.2    |
|       | 619.12 | 4(R)EKAK[136.10][K151]QSR(V)        | 4(R)V[K156]AAELEAEQR(E) | S4  | S4  | 8.078  |
|       | 554.84 | 4(K)AK[136.10][K151]QSR(V)          | 4(R)V[K156]AAELEAEQR(E) | S4  | S4  | 8.078  |
| Trap7 |        |                                     |                         |     |     |        |
|       | 451.53 | 4(R)FV[K30]HPIYGK(F)                | 4(R)IY[K87]R(K)         | S17 | S8  | 12.2   |
|       | 340.23 | 4(R)[K76]FGLSR(I)                   | 4(R)I[K83]VR(E)         | S14 | S14 | 12.718 |

NA- not available, The 2,3,4 numbers in peptides 1 and 2 columns indicate the EThcD crosslinked peptide mass pairs.
